# Supplementary material
Source: PubMed Central journal article supplement (PMC4890168)
Supplement: NIHMS788676-supplement-SI.pdf [file NIHMS788676-supplement-SI.pdf]

## Supporting Information:

### Structure-Based Design, Synthesis and Biological Evaluation of Highly Selective and Potent G Protein-Coupled Receptor Kinase 2 Inhibitors

*Helen V. Waldschmidt<sup>a,b,d</sup>, Kristoff T. Homan<sup>b,d,†</sup>, Osvaldo Cruz-Rodríguez<sup>b,c,d</sup>, Marilyn C. Cato<sup>b,d</sup>, Jessica Waninger-Saroni<sup>b,d,e</sup>, Kelly L. Larimore<sup>b,d</sup>, Alessandro Cannavo<sup>f</sup>, Jianliang Song<sup>f</sup>, Joseph Y. Cheung<sup>f</sup>, Walter J. Koch<sup>f</sup>, John J. G. Tesmer<sup>b,d</sup>, and Scott D. Larsen,<sup>a,d\*</sup>*

<sup>a</sup>Vahlteich Medicinal Chemistry Core, College of Pharmacy, <sup>b</sup>Life Sciences Institute, <sup>c</sup>PhD Program in Chemical Biology, <sup>d</sup>Departments of Medicinal Chemistry, Pharmacology and Biological Chemistry, <sup>e</sup>Medical Scientist Training Program, University of Michigan, Ann Arbor, Michigan, 48109, <sup>f</sup>Center for Translational Medicine, Temple University, Philadelphia, Pennsylvania, 19140

#### Table of contents:

|                                                                                                           |           |
|-----------------------------------------------------------------------------------------------------------|-----------|
| Table S1: Crystal Refinement Statistics                                                                   | <b>S2</b> |
| Table S2: Compound Ki, Buried ASA, and Number of Hydrogen Bonds with GRK2                                 | <b>S2</b> |
| Table S3: Results of inhibitors at their minimum inhibitory concentration tested in mouse cardiomyocytes. | <b>S3</b> |
| Table S4: Mouse contractility results for compound 12h from 0.1 to 10 $\mu$ M                             | <b>S3</b> |
| Table S5: Mouse contractility results for compound 12d from 0.1 to 10 $\mu$ M                             | <b>S4</b> |
| Table S6: Mouse contractility results for compound 12m from 0.1 to 10 $\mu$ M                             | <b>S4</b> |
| Table S7: Mouse contractility results for compound 12n from 0.1 to 10 $\mu$ M                             | <b>S5</b> |
| Table S8: Mouse contractility results for compound 2 at 0.5 and 1 $\mu$ M                                 | <b>S5</b> |

**Table S1. Crystal Refinement Statistics**

| Protein Complex                                | GRK2-G $\beta\gamma$ *         | GRK2-G $\beta\gamma$ *         | GRK2-G $\beta\gamma$ *         | GRK2-G $\beta\gamma$ *         |
|------------------------------------------------|--------------------------------|--------------------------------|--------------------------------|--------------------------------|
|                                                | CCG-215022                     | CCG-224062                     | CCG-224406                     | CCG-224411                     |
| X-ray source                                   | APS 21-ID-G                    | APS 21-ID-G                    | APS 21-ID-G                    | APS 21-ID-G                    |
| wavelength (Å)                                 | 0.97857                        | 0.97857                        | 0.97857                        | 0.97857                        |
| $D_{\min}$ (Å)                                 | 30–2.6 (2.64–2.56)             | 30–3.2 (3.26–3.2)              | 30–2.8 (2.85–2.8)              | 30–2.8 (2.85–2.8)              |
| space group                                    | $C222_1$                       | $C222_1$                       | $C222_1$                       | $C222_1$                       |
| cell constants (Å)                             | $a=60.6$<br>$b=240$<br>$c=209$ | $a=62.0$<br>$b=241$<br>$c=213$ | $a=60.7$<br>$b=242$<br>$c=214$ | $a=60.0$<br>$b=239$<br>$c=209$ |
| unique reflections                             | 47002 (2068)                   | 27203 (1277)                   | 37227 (1655)                   | 36395 (1800)                   |
| $R_{\text{sym}}$ (%)                           | 6.7 (39.1)                     | 14.6 (0.0)                     | 5.5 (76.0)                     | 10.4 (93.6)                    |
| completeness (%)                               | 97.0 (86.1)                    | 96.7 (92.3)                    | 94.0 (84.5)                    | 93.3 (93.5)                    |
| $\langle I \rangle / \langle \sigma_I \rangle$ | 25.8 (2.6)                     | 17.8 (1.5)                     | 20.3 (1.6)                     | 19.6 (1.9)                     |
| redundancy                                     | 3.5 (2.5)                      | 7.3 (6.9)                      | 3.6 (2.7)                      | 4.6 (4.5)                      |
| refinement resolution (Å)                      | 30–2.6 (2.64–2.56)             | 30–3.2 (3.26–3.2)              | 30–2.8 (2.85–2.8)              | 30–2.8 (2.85–2.8)              |
| total reflections used                         | 44654                          | 25783                          | 35332                          | 34492                          |
| RMSD bond lengths (Å)                          | 0.013                          | 0.0115                         | 0.0115                         | 0.012                          |
| RMSD bond angles (°)                           | 1.65                           | 1.57                           | 1.55                           | 1.57                           |
| est. coordinate error (Å)                      | 0.25                           | 0.37                           | 0.31                           | 0.29                           |
| Ramachandran plot:                             |                                |                                |                                |                                |
| most favored, outliers (%)                     | 92.3, 0.8                      | 89.3, 1.3                      | 91.3, 0.5                      | 90.3, 1.2                      |
| $R_{\text{work}}$                              | 0.205                          | 0.172                          | 0.202                          | 0.198                          |
| $R_{\text{free}}$                              | 0.264                          | 0.250                          | 0.277                          | 0.257                          |
| protein atoms                                  | 8178                           | 8171                           | 8218                           | 8183                           |
| water molecules                                | 29                             | 34                             | 31                             | 40                             |
| inhibitor atoms                                | 37                             | 41                             | 41                             | 40                             |
| average $B$ -factor (Å <sup>2</sup> )          | 71.3                           | 100                            | 70.6                           | 75.5                           |
| Protein                                        | 71.5                           | 101                            | 71.0                           | 75.6                           |

---

|                                |      |      |      |      |
|--------------------------------|------|------|------|------|
| Inhibitor                      | 65.2 | 112  | 61.9 | 120  |
| MolProbity score               | 2.32 | 2.39 | 2.14 | 2.59 |
| MolProbity $C\beta$ deviations | 1    | 1    | 0    | 0    |
| MolProbity bad backbone bonds  | 0    | 1    | 0    | 1    |
| MolProbity bad backbone angles | 1    | 1    | 1    | 0    |
| PDB entry                      | 5HE0 | 5HE1 | 5HE2 | 5HE3 |

---

Numbers in parentheses correspond to the highest resolution shell of data.

**Table S2: Compound  $K_i$ , buried ASA, and number of hydrogen bonds with GRK2**

| <b>Compound</b>      | <b><math>K_i</math> (<math>\mu\text{M}</math>)</b> | <b>Buried ASA (<math>\text{\AA}^2</math>)</b> | <b># Hydrogen Bonds</b> |
|----------------------|----------------------------------------------------|-----------------------------------------------|-------------------------|
| Balanol              | 0.55                                               | 420                                           | 8                       |
| Paroxetine           | 22                                                 | 250                                           | 4                       |
| 206584 <sup>43</sup> | 4.0                                                | 270                                           | 3                       |
| Takeda101            | 4.6                                                | 370                                           | 2                       |
| <b>1</b>             | 0.85                                               | 390                                           | 2                       |
| <b>12h</b>           | 2.4                                                | 380                                           | 5                       |
| <b>12k</b>           | 4.4                                                | 310                                           | 5                       |
| <b>12n</b>           | 2.05                                               | 400                                           | 5                       |
| <b>12r</b>           | 3.6                                                | 320                                           | 3                       |
| <b>2</b>             | 12                                                 | 290                                           | 4                       |

$K_i$  values were calculated using the Cheng-Prussoff equation. Buried ASA was calculated using the AREAIMOL tool in the CCP4 program suite.<sup>44</sup> See graphical representation as Figure 5 in text.

**Table S3: Minimum inhibitory concentrations of inhibitors tested in mouse cardiomyocytes**

|                                           | Control       | Paroxetine      | 2               | 12h           | 12d           | 12m           | 12n           |
|-------------------------------------------|---------------|-----------------|-----------------|---------------|---------------|---------------|---------------|
|                                           | (DMSO)        | 10 $\mu$ M      | 1 $\mu$ M       | 0.5 $\mu$ M   | 0.5 $\mu$ M   | 1 $\mu$ M     | 0.5 $\mu$ M   |
| <b>Baseline before isoproterenol</b>      |               |                 |                 |               |               |               |               |
| max contraction amplitude (% cell length) | 5.7 $\pm$ 0.4 | 4.7 $\pm$ 0.2   | 6.0 $\pm$ 0.7   | 5.9 $\pm$ 0.2 | 4.6 $\pm$ 0.9 | 5.5 $\pm$ 0.7 | 3.9 $\pm$ 0.5 |
| <b>After isoproterenol</b>                |               |                 |                 |               |               |               |               |
| max contraction amplitude (% cell length) | 12 $\pm$ 0.5  | 16.5 $\pm$ 0.6* | 17.5 $\pm$ 0.8* | 16 $\pm$ 1*   | 17 $\pm$ 1*   | 15 $\pm$ 0.6* | 15 $\pm$ 1*   |
| % increase in contraction amplitude       | 110 $\pm$ 10  | 260 $\pm$ 30*   | 200 $\pm$ 30*   | 175 $\pm$ 20* | 340 $\pm$ 70* | 210 $\pm$ 40* | 340 $\pm$ 65* |

Values represent the mean  $\pm$  SEM for 6-10 cardiomyocytes. \*,p<0.05 vs Control

**Table S4: Cardiomyocyte contractility results for compound 12h from 0.1 to 10  $\mu$ M**

| <b>12h</b>                                      | <b>Control<br/>(DMSO)</b> | <b>0.1 <math>\mu</math>M</b> | <b>0.5 <math>\mu</math>M</b> | <b>1 <math>\mu</math>M</b> | <b>10 <math>\mu</math>M</b> |
|-------------------------------------------------|---------------------------|------------------------------|------------------------------|----------------------------|-----------------------------|
| <b>Baseline before isoproterenol</b>            |                           |                              |                              |                            |                             |
| max contraction<br>amplitude (% cell<br>length) | 5.7 $\pm$ 0.4             | 5.6 $\pm$ 0.5                | 5.9 $\pm$ 0.2                | 5.9 $\pm$ 0.55             | 4.6 $\pm$ 0.5               |
| <b>After isoproterenol</b>                      |                           |                              |                              |                            |                             |
| max contraction<br>amplitude (% cell<br>length) | 12 $\pm$ 0.5              | 12 $\pm$ 1                   | 16 $\pm$ 1*                  | 16.5 $\pm$ 1*              | 13 $\pm$ 1                  |
| % increase in<br>contraction<br>amplitude       | 110 $\pm$ 10              | 115 $\pm$ 20                 | 175 $\pm$ 20*                | 170 $\pm$ 20*              | 220 $\pm$ 40*               |

Values represent the mean  $\pm$  SEM for 8-10 cardiomyocytes. \*,p<0.05 vs Control

**Table S5: Cardiomyocyte contractility results for compound 12d from 0.1 to 10  $\mu$ M**

| <b>12d</b>                                      | <b>Control<br/>(DMSO)</b> | <b>0.1 <math>\mu</math>M</b> | <b>0.5 <math>\mu</math>M</b> | <b>1 <math>\mu</math>M</b> | <b>10 <math>\mu</math>M</b> |
|-------------------------------------------------|---------------------------|------------------------------|------------------------------|----------------------------|-----------------------------|
| <b>Baseline before isoproterenol</b>            |                           |                              |                              |                            |                             |
| max contraction<br>amplitude (% cell<br>length) | 5.7 $\pm$ 0.4             | 6.0 $\pm$ 2                  | 4.6 $\pm$ 0.9                | 5.6 $\pm$ 0.6              | 5.7 $\pm$ 0.2               |
| <b>After isoproterenol</b>                      |                           |                              |                              |                            |                             |
| max contraction<br>amplitude (% cell<br>length) | 12 $\pm$ 0.5              | 12 $\pm$ 2                   | 17 $\pm$ 1*                  | 16 $\pm$ 0.6*              | 15 $\pm$ 0.6*               |
| % increase in<br>contraction<br>amplitude       | 110 $\pm$ 10              | 110 $\pm$ 30                 | 340 $\pm$ 70*                | 200 $\pm$ 30*              | 175 $\pm$ 20*               |

Values represent the mean  $\pm$  SEM for 8-10 cardiomyocytes. \*,p<0.05 vs Control

**Table S6: Cardiomyocyte contractility results for compound 12m from 0.1 to 10  $\mu$  M**

| <b>12m</b>                                      | <b>Control<br/>(DMSO)</b> | <b>0.1 <math>\mu</math>M</b> | <b>0.5 <math>\mu</math>M</b> | <b>1 <math>\mu</math>M</b> | <b>10 <math>\mu</math>M</b> |
|-------------------------------------------------|---------------------------|------------------------------|------------------------------|----------------------------|-----------------------------|
| <b>Baseline before isoproterenol</b>            |                           |                              |                              |                            |                             |
| max contraction<br>amplitude (% cell<br>length) | 5.7 $\pm$ 0.4             | 5.2 $\pm$ 0.4                | 5.05 $\pm$ 0.5               | 5.5 $\pm$ 0.7              | 5.1 $\pm$ 1                 |
| <b>After isoproterenol</b>                      |                           |                              |                              |                            |                             |
| max contraction<br>amplitude (% cell<br>length) | 12 $\pm$ 0.5              | 13 $\pm$ 0.8                 | 13 $\pm$ 0.6                 | 15 $\pm$ 0.6*              | 17 $\pm$ 1*                 |
| % increase in<br>contraction<br>amplitude       | 110 $\pm$ 10              | 150 $\pm$ 15                 | 175 $\pm$ 30*                | 210 $\pm$ 40*              | 275 $\pm$ 50*               |

Values represent the mean  $\pm$  SEM for 8-10 cardiomyocytes. \*,p<0.05 vs Control



**Table S7: Cardiomyocyte contractility results for compound 12n from 0.1 to 10  $\mu$ M**

| <b>12n</b>                                | <b>Control<br/>(DMSO)</b> | <b>0.1 <math>\mu</math>M</b> | <b>0.5 <math>\mu</math>M</b> | <b>1 <math>\mu</math>M</b> | <b>10 <math>\mu</math>M</b> |
|-------------------------------------------|---------------------------|------------------------------|------------------------------|----------------------------|-----------------------------|
| <b>Baseline before isoproterenol</b>      |                           |                              |                              |                            |                             |
| max contraction amplitude (% cell length) | 4.5 $\pm$ 0.3             | 4.5 $\pm$ 0.5                | 3.9 $\pm$ 0.5                | 4.4 $\pm$ 0.7              | 4.8 $\pm$ 0.4               |
| <b>After isoproterenol</b>                |                           |                              |                              |                            |                             |
| max contraction amplitude (% cell length) | 11.5 $\pm$ 1              | 12 $\pm$ 1                   | 15 $\pm$ 1*                  | 18 $\pm$ 0.7*              | 16 $\pm$ 0.6*               |
| % increase in contraction amplitude       | 160 $\pm$ 20              | 170 $\pm$ 30                 | 340 $\pm$ 65*                | 350 $\pm$ 70*              | 240 $\pm$ 30*               |

Values represent the mean  $\pm$  SEM for 6-8 cardiomyocytes. \*,p<0.05 vs Control

**Table S8: Cardiomyocyte contractility results for compound 2 at 0.5 and 1  $\mu$ M**

| <b>GSK180736A (2)</b>                           | <b>Control<br/>(DMSO)</b> | <b>0.5 <math>\mu</math>M</b> | <b>1.0 <math>\mu</math>M</b> |
|-------------------------------------------------|---------------------------|------------------------------|------------------------------|
| <b>Baseline before isoproterenol</b>            |                           |                              |                              |
| max contraction<br>amplitude (% cell<br>length) | 5.7 $\pm$ 0.4             | 5.2 $\pm$ 0.6                | 6.0 $\pm$ 0.7                |
| <b>After isoproterenol</b>                      |                           |                              |                              |
| max contraction<br>amplitude (% cell<br>length) | 12 $\pm$ 0.5              | 15.5 $\pm$ 2                 | 17.5 $\pm$ 0.8*              |
| % increase in<br>contraction<br>amplitude       | 110 $\pm$ 10              | 180 $\pm$ 40                 | 201 $\pm$ 30*                |

Values represent the mean  $\pm$  SEM for 8-10 cardiomyocytes. \*,p<0.05 vs Control
